# Supplementary material for: Patients with Common Variable Immunodeficiency Complicated by Autoimmune Phenomena Have Lymphopenia and Reduced Treg, Th17, and NK Cells
Source: MDPI journal article supplement (doi:10.3390/jcm10153356), 2021-07-29

**Table 1S. Internal laboratory reference values of lymphocyte subpopulations and absolute numbers**

|                                | % of lymphocytes | cells/ $\mu$ l |
|--------------------------------|------------------|----------------|
| lymphocytes T<br>(CD3+)        | 60 – 82          | 900 – 2100     |
| lymphocytes Th<br>(CD3+ CD4+)  | 33 – 55          | 500 – 1300     |
| lymphocytes Ts<br>(CD3+ CD8+)  | 18 – 40          | 280 – 900      |
| CD4/CD8 ratio                  | 1.1 – 2.8        |                |
| NK cells<br>(CD3- CD16+ CD56+) | 7 – 23           | 90 – 630       |
| lymphocytes B<br>(CD19+)       | 5 – 16           | 120 – 400      |

**Table 2S. Internal laboratory reference values if the proportions of B lymphocyte maturation**

|                                                                                          | % CD19+     |
|------------------------------------------------------------------------------------------|-------------|
| Transitional B cells<br>IgM++ IgD++ CD38++ CD27- CD21+                                   | 0.9 – 6.3   |
| Naive B cells<br>IgM+ IgD++ CD38+ CD27- CD21+                                            | 53.3 – 86.0 |
| Non-switched memory B cells (Marginal zone-like B cells)<br>IgM++ IgD+ CD38+ CD27+ CD21+ | 3.3 – 12.8  |
| Class switched memory B cells<br>IgM- IgD- CD38+ CD27+ CD21+                             | 4.0 – 22.1  |
| CD21 <sup>low</sup> B cells<br>IgM+ IgD+ CD38 <sup>low</sup> CD27- CD21 <sup>low</sup>   | 0.6 – 7.6   |
| Plasmablasts<br>IgM-/+ IgD- CD38+++ CD27++ CD21+                                         | 0.1 – 1.5   |

**Table 3S. Internal laboratory reference values if the proportions of T lymphocyte maturation**

|                                          | % CD4+      | % CD8+      |
|------------------------------------------|-------------|-------------|
| Naive T cells<br>CD45RA+ CD197+          | 18.2 – 53.2 | 18.6 – 70.6 |
| Effector T cells<br>CD45RA+ CD197-       | 1.1 – 9.0   | 4.0 – 24.0  |
| Central memory T cells<br>CD45RO+ CD197+ | 8.3 – 27.1  | 0,5 – 5,4%  |

|                                                         |             |             |   |
|---------------------------------------------------------|-------------|-------------|---|
| Effector memory T cells<br>CD45RO+ CD197-               | 17.2 – 51.4 | 16.7 – 42.6 |   |
| Th17<br>CD45RO+ CD196+                                  | 10.8 – 39.0 | -           | - |
| Recent thymic emigrants T cells<br>CD45RA+ CD62L+ CD31+ | 14.4 – 38.3 | 16.7 – 64.7 |   |

**Figure 1S.** Representative gating strategy of main lymphocytes subpopulation and T regulatory (Tregs), B regulatory cells (B regs) and Th17 cells in study group.

(A) T (CD4<sup>+</sup> and CD8<sup>+</sup> cells), B, NK lymphocytes gating strategy: FSC-A vs. FSC-H plot: Gating the cells that have an equal area and height, thus removing clumps (greater FSC-A relative to FSC-H) and debris (very low FSC), CD45 vs. SSC-A plot: Selection of lymphocytes based on their SSC/CD45<sup>+</sup> properties, CD3 vs. CD19 plot: Selection of lymphocytes T (pink and yellow) and B (orange) based on their CD3<sup>+</sup> or CD19<sup>+</sup> properties, CD4 vs. CD8 plot: Selection of subpopulation of lymphocytes T: CD4 cells (pink) and CD8 cells (yellow) based on their CD4<sup>+</sup> or CD8<sup>+</sup> properties, CD3 vs. CD16 plot: Selection of NK cell (blue) based on their CD3<sup>-</sup>/CD16<sup>+</sup> properties

(B) Representative dot plots of Tregs, Bregs and Th17 cells (green), CD25 vs. 127 plot: Selection of Tregs (white) based on their CD25<sup>high</sup>/CD127<sup>-</sup> properties, CD5 vs. CD1d plot: Selection of Breg (light blue) based on their CD5<sup>+</sup>/CD1d<sup>+</sup> properties, CD196 vs. CD45RO plot: Selection of Th17 cells (green) based on their CD196<sup>+</sup>/CD45RO<sup>+</sup> properties.

A

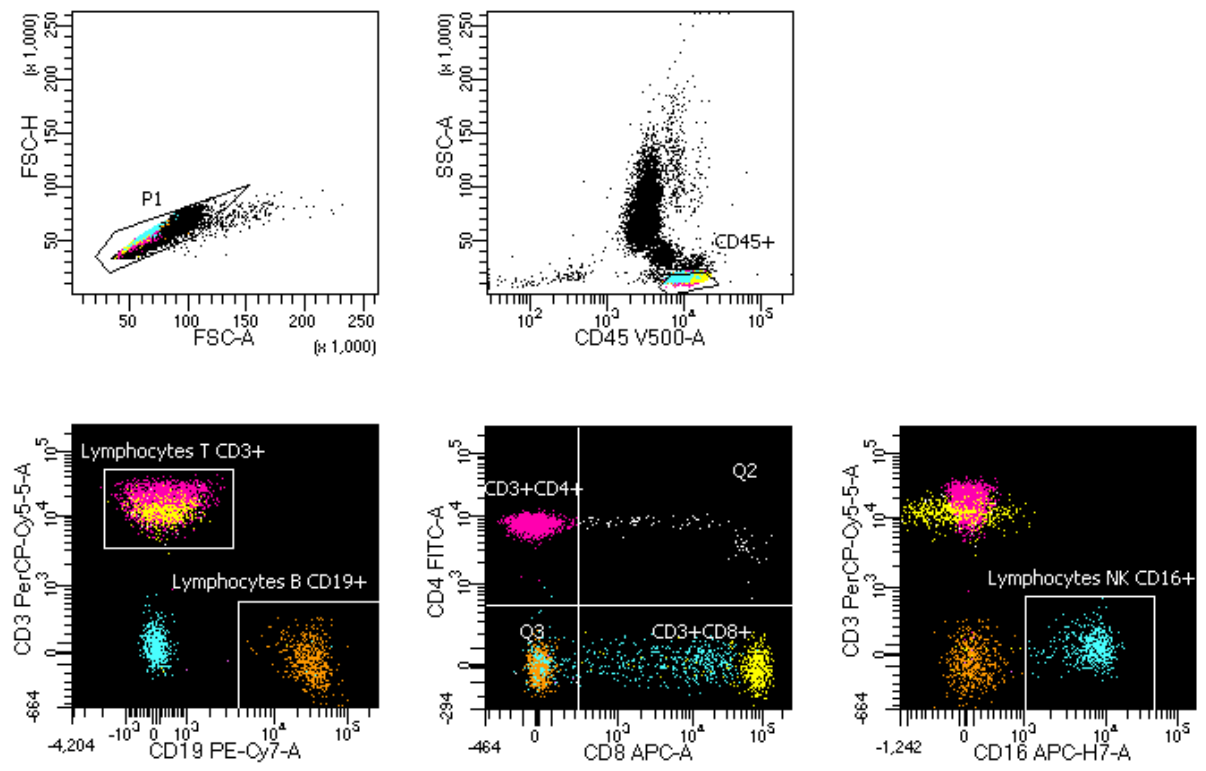

B

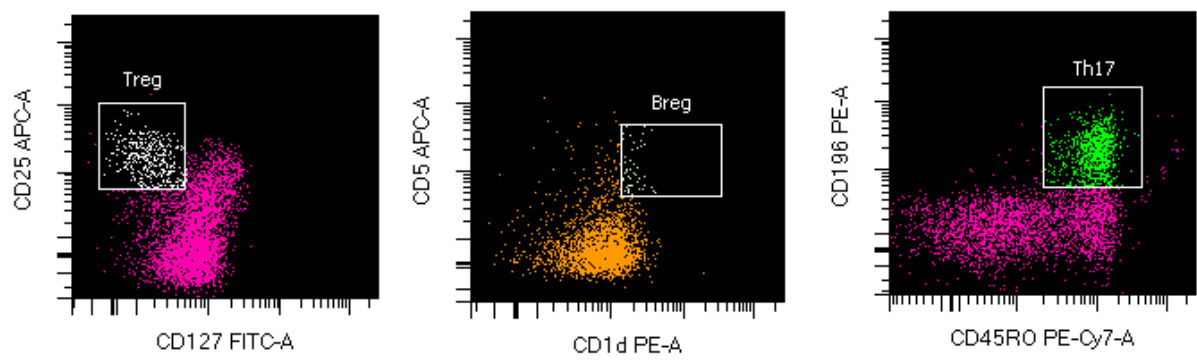

**Figure 2S.** Representative B lymphocytes maturation gating strategy in study group. (A) B lymphocytes gating strategy: FSC-A vs. FSC-H plot: Gating the cells that have an equal area and height, thus removing clumps (greater FSC-A relative to FSC-H) and debris (very low FSC), CD45 vs. SSC-A plot: Selection of lymphocytes based on their SSC/CD45+ properties, CD19 vs. SSC-A plot: Selection of lymphocytes B based on their SSC/CD19+ properties. (B) Representative dot plots of each maturation B subsets cells: transitional B cells (orange), naïve B cells (blue), non-switched memory B cells (red), class switched memory B cells (yellow), CD21<sup>low</sup> cells (purple) and plasmablasts (green) based on their IgD/IgM, IgD/CD38, CD21/CD38, IgM/CD38, CD27/CD21 properties (phenotypes of all cells described in section: material and method).

**A**

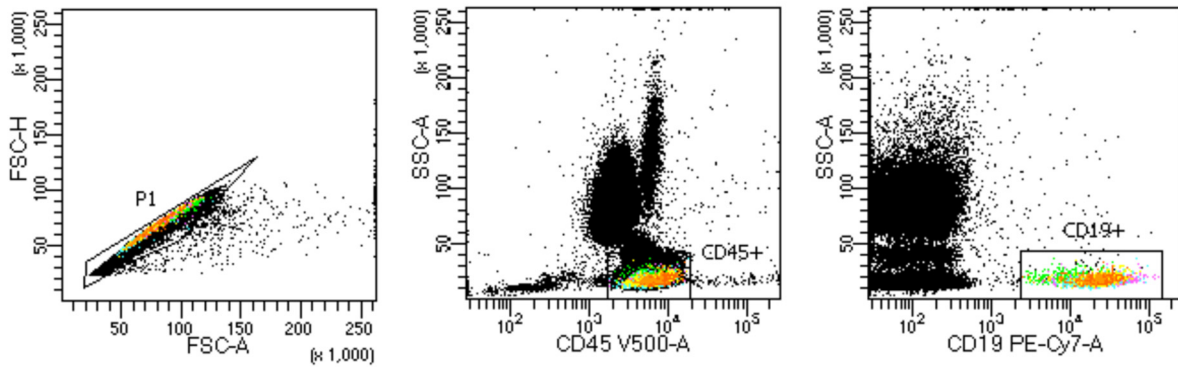

**B**

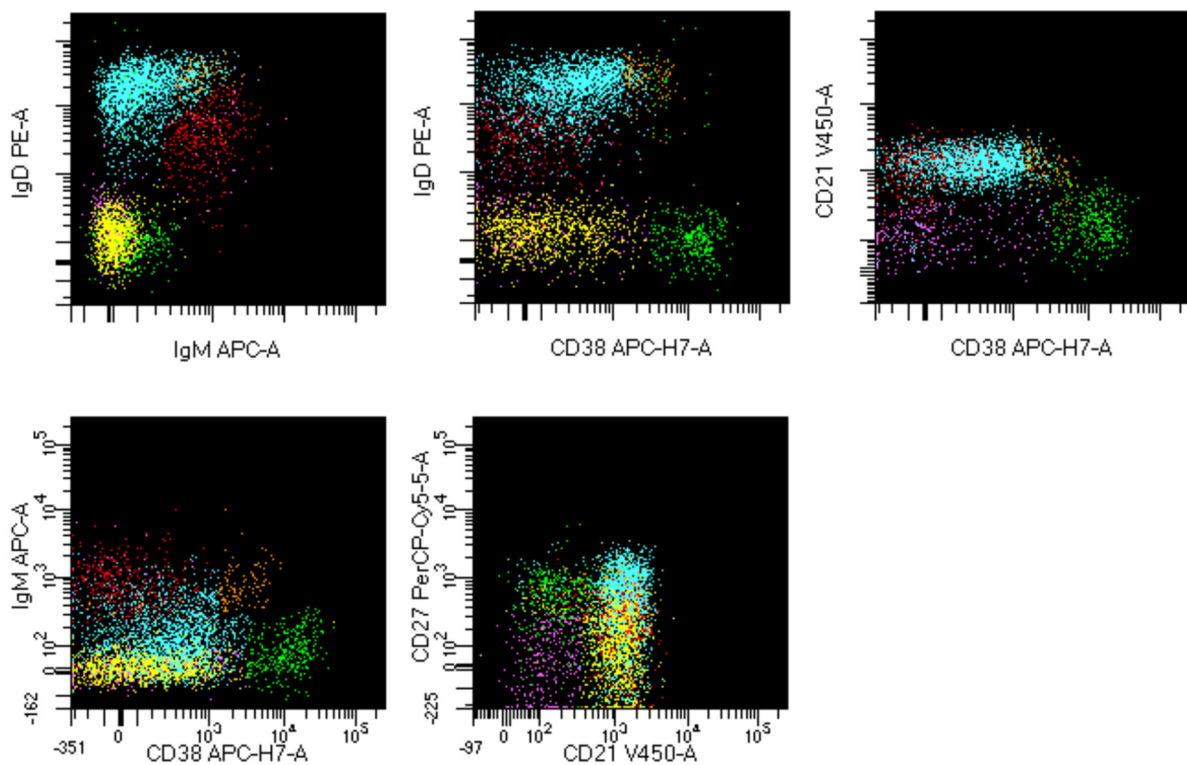

**Figure 3S.** Representative T lymphocytes maturation gating strategy in study group. (A) T lymphocytes gating strategy: FSC-A vs. FSC-H plot: Gating the cells that have an equal area and height, thus removing clumps (greater FSC-A relative to FSC-H) and debris (very low FSC), CD45 vs. SSC-A plot: Selection of lymphocytes based on their SSC/CD45+ properties, CD3 vs. SSC-A plot: Selection of lymphocytes T based on their SSC/CD3+ properties. CD4 vs. CD8 plot: Selection of lymphocytes T CD4+ (pink) and CD8+ (yellow) based on their CD4+ or CD8+ properties. (B) Representative dot plots of each maturation T CD4+ subsets cells: recent thymic emigrants T CD4+ cells, naïve CD4+ T cells, effector CD4+ T cells, central memory CD4+ T cells and effector memory CD4+ T cells based on CD197/CD45RO, CD62L/CD45RA, CD45RA/CD31 properties (phenotypes of all cells described in section: material and method). (C) Representative dot plots of each maturation T CD8+ subsets cells: recent thymic emigrants T CD8+ cells, naïve CD8+ T cells, effector CD8+ T cells, central memory CD8+ T cells and effector memory CD8+ T cells based on their CD197/CD45RO, CD62L/CD45RA, CD45RA/CD31 properties (phenotypes of all cells described in section: material and method).

**A**

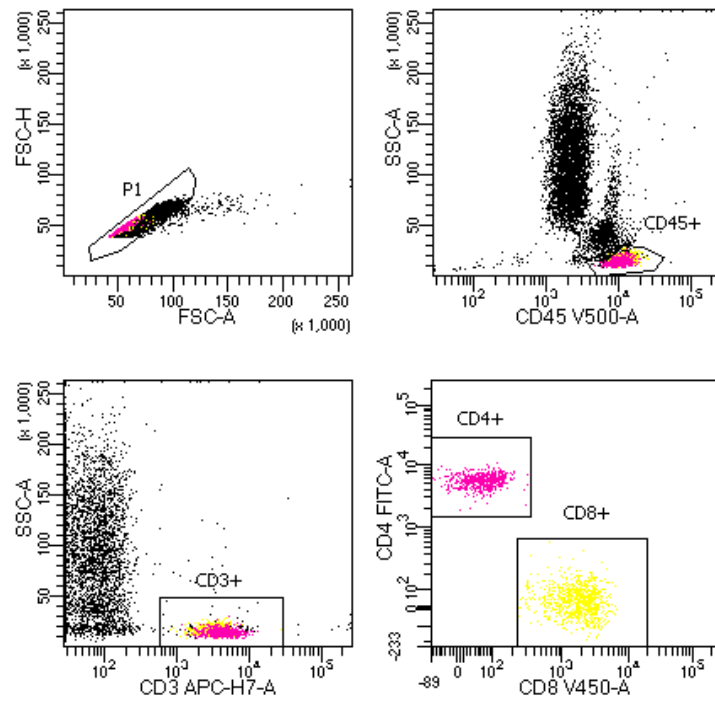

**B**

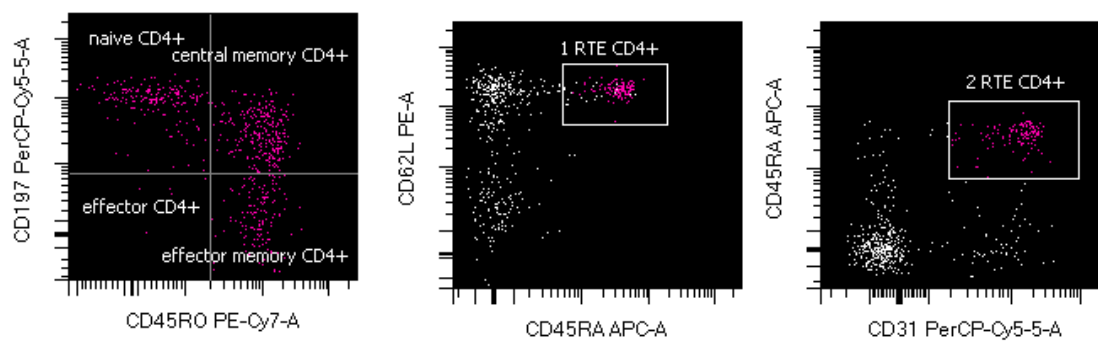

**C**

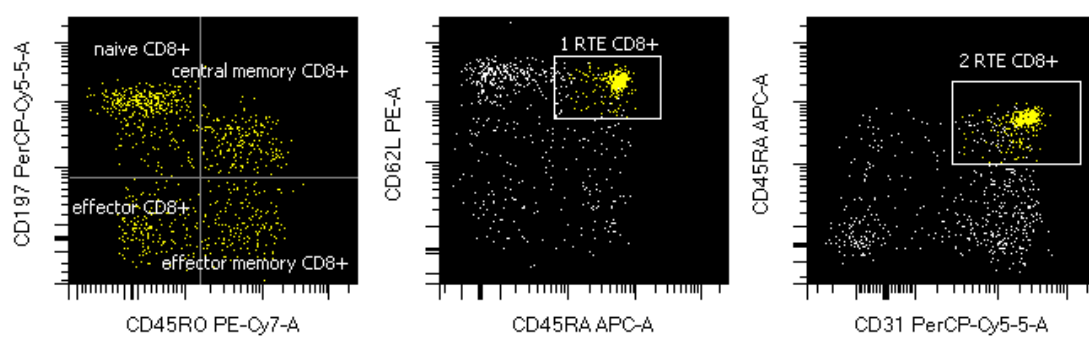

Supplement: s1 [file s1]
